## RESEARCH ARTICLE

# Anti *H. pylori*, anti-secretory and gastroprotective effects of *Thymus vulgaris* on ethanol-induced gastric ulcer in Sprague Dawley rats

Salah Tofik Jalal Balaky <sup>1,2\*</sup>

**1** Medical Microbiology Department, College of Health Sciences, Hawler Medical University, Kurdistan Region, Iraq, **2** Medical Analysis Department, Tishk International University, Erbil, Iraq

\* [salah.balaky@hmu.edu.krd](mailto:salah.balaky@hmu.edu.krd)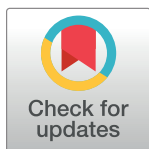

## Abstract

The objectives of the present study were to evaluate the acute toxicity, gastroprotective, therapeutic, anti-inflammatory and anti *H. pylori* activities of *T. vulgaris* total plant extract against ethanol-induced gastric ulcers in Sprague Dawley rats. Animals were divided into five groups i.e G-1 (Normal Control), Group 2 (ulcer control) were administered orally with 0.5% Carboxymethylcellulose (CMC), Group 3 (omeprazole treated) was administered orally with 20 mg/kg of omeprazole and Groups 4 and 5 (Low dose and High dose of the extract) were administered orally with 250, and 500 mg/ kg of *Thymus vulgaris* extract, respectively. After 1 hour, the normal group was orally administered with 0.5% CMC (5 ml/kg), whereas absolute alcohol (5ml/ kg) was orally administered to the ulcer control group, omeprazole group, and experimental groups. Stomachs were examined macroscopically and microscopically. Grossly, rats pre-treated with *T. vulgaris* demonstrated significantly decreased ulcer area and an increase in mucus secretion and pH of gastric content compared with the ulcer control group. Microscopy of gastric mucosa in the ulcer control group showed severe damage to gastric mucosa with edema and leukocytes infiltration of the sub-mucosal layer. However, rats pretreated with omeprazole or *Thyme vulgaris* exhibited a mild to moderate disruption of the surface epithelium and lower level of edema and leukocyte infiltration of the submucosal layer. The *T. vulgaris* extract caused up-regulation of Hsp70 protein, down-regulation of Bax protein, and intense periodic acid Schiff uptake of the glandular portion of the stomach. Gastric mucosal homogenate of rats pre-treated with *T. vulgaris* exhibited significantly increased superoxide dismutase (SOD) and catalase (CAT) activities while malondialdehyde (MDA) level was significantly decreased. Based on the results showed in this study, *Thymus vulgaris* extract can be proposed as the safe medicinal plants for use and it has considerable gastroprotective potential via stomach epithelium protection against gastric ulcers and stomach lesions.

## OPEN ACCESS

**Citation:** Balaky STJ (2024) Anti *H. pylori*, anti-secretory and gastroprotective effects of *Thymus vulgaris* on ethanol-induced gastric ulcer in Sprague Dawley rats. PLoS ONE 19(1): e0287569. <https://doi.org/10.1371/journal.pone.0287569>

**Editor:** Sairah Hafeez Kamran, Lahore College for Women University, PAKISTAN

**Received:** July 23, 2022

**Accepted:** June 8, 2023

**Published:** January 25, 2024

**Copyright:** © 2024 Salah Tofik Jalal Balaky. This is an open access article distributed under the terms of the [Creative Commons Attribution License](https://creativecommons.org/licenses/by/4.0/), which permits unrestricted use, distribution, and reproduction in any medium, provided the original author and source are credited.

**Data Availability Statement:** Data including values and numbers used to produce results are included as [supporting information](#).

**Funding:** The author(s) received no specific funding for this work.

**Competing interests:** The authors have declared that no competing interests exist.

## Introduction

Gastric ulcer considered acid-induced lesions of the gastrointestinal tract in the stomach or proximal duodenum. The disease is characterized by exposed mucosa and defect extending into the submucosa or muscularis propria [1–3]; The estimated prevalence of peptic ulcer disease in the general population is 5–10% [4,5]. Several studies have reported a decrease in morbidity and mortality correlated with peptic ulcer. This is possibly due to the introduction of new treatment and better hygiene, which resulted in a reduction of infections caused by *Helicobacter pylori* (*H. pylori*) [6,7].

The most frequent etiologies of gastric ulcers are *H. pylori* infections and gastric prostaglandin loss related to anti-inflammatory drugs. Other factors cause gastric ulcers including hypergastrinemia (Zollinger-Ellison syndrome), infections caused by viruses such as Cytomegalovirus, chemotherapy and radiation. The main mechanism of these factors is that they cause interruption in the mucosal barrier and reveal the gastric mucosa to the harmful influences of acids. [8,9].

*H. pylori* is a common pathogen infecting about 50% of the world's population, with higher rates in developing countries compared to developed ones. The pathogen can lead to a number of gastrointestinal disorders including peptic ulcer, gastric adenocarcinoma, and mucosa-associated lymphoid tissue lymphoma (MALT) [6,10]. Ethanol consumption could lead to severe gastric ulcers by stimulating gastric mucosa instabilities, such as mucus production and reduction in bicarbonate secretion. Furthermore, the development of ethanol induced lesions is closely associated with neutrophil infiltration into the gastric mucosa [2,11,12].

The significance of natural products in modern medicine are well recognized and they continue to be of interest as sources of novel lead compounds [13]. *Thymus vulgaris* (*T. vulgaris*) is a medicinal plant, belongs to Lamiaceae family, native to southern Europe from the western Mediterranean to southern Italy, widely used in pharmacology, is commonly used as a culinary herb, and it also has a long history of use for different medicinal purposes [13,14]. *T. vulgaris* has multiple mechanisms in healing of respiratory disorders such as decrease in interleukins induced by reduction of nuclear factor B (NF- $\kappa$ B). In addition, the aromatic oil of *T. vulgaris* could lead to the inhibition of some viral reproduction [15]. Thymol's anti-inflammatory effects were demonstrated *in vitro* by its inhibitory effect on human neutrophil's elastase release and also decrease in the production of tumor necrosis factor alpha and interleukin IL-6 [16,17]. Studies suggest that thymol, in common with other phenolic derivatives, has important antioxidant properties, which may adsorb and neutralize free radicals and exhibit redox properties [18,19]. Thymol also induces the activity of endogenous antioxidant enzymes, such as superoxide dismutase, glutathione peroxidase, glutathione-S-transferase, catalase [5,20].

Omeprazole is a proton pump inhibitor, which can be easily converted in an acidic environment and can control the interior environment of the stomach, defend the gastric mucosa, and improve the clinical appearances of gastric ulcer [8,21,22]. The effect of omeprazole alone is not very satisfactory [23–25], however, it is effective when combined with amoxicillin in the clinical treatment of gastric ulcer patients, especially for treating infections caused by *H. pylori* [6,22]. Omeprazole can effectively reduce the secretion of gastric acid, which reduces the symptoms of gastric ulcer [26,27]. The mechanism of action of omeprazole is by binding with hydrogen ions, ATPase and potassium ion, for inactivating it and controlling gastric acid secretion [18,28]. Another mechanism of action occurs from selective and covalent activation with H<sup>+</sup> /K<sup>+</sup> -ATPase, leading to potent inhibition of gastric acid secretion causing changes in the stomach flora [29].

The objectives of the present study were to evaluate the acute toxicity, gastroprotective, therapeutic, anti-inflammatory, and anti *H. pylori* activities of *T. vulgaris* total plant extract against ethanol-induced gastric ulcers in Sprague Dawley rats by evaluating morphological and histopathological damages to their stomach.

## Methods

### Preparation of plant extract

Dried leaves of *T. vulgaris* plant was obtained from an aromatic shop in Erbil city, and Voter number (ERB 2471) was deposited in the College of Health Sciences, Hawler Medical University. The herb was then finely powdered using an electric blender. The fine powder (250 g) was soaked in 500 ml absolute ethanol in a conical flask for 6 days at 37°C. The mixture was then filtered using a fine muslin cloth followed by filter paper (Whatman No. 1) and distilled under reduced pressure in an Eyela rotary evaporator (Sigma-Aldrich, USA). The solvent was removed by reducing the pressure within the flask using a vacuum, rotating the sample to heat the solution and increase its effective surface area. Five gram of the dry extract was then dissolved in 50ml of carboxymethyl cellulose (CMC, 0.5% w/v) at a concentration of 100mg/ml and stored in sealed dark vials at 4°C until use [30,31].

### GC/ MS analyses

To profile *T. vulgaris* essential components, gas chromatography-mass spectrometry (GC/MS) analysis was carried out according to the methods described earlier [32]. Gas chromatography analysis was performed on Agilent GC/MS (model GC6890/ MS5973 / USA) with DB-5MS UI capillary column (60m × 0.25mm OD × 0.25µm film thickness). One microlitre of the extract diluted in 10% hexane was subjected to GC/MS. Injector or detector temperature for each analysis was about 250 C, and the carrier gas was helium, with a flow rate of 0.8 mL/minute. Peak areas were measured by electronic integration, and relative amounts of the individual components were based on the peak areas and expressed in percentages.

### In vitro anti-*Helicobacter pylori* activity

Two *H. pylori* strains NCTC 11637 (American Type Culture Collection ATCC 43504) and J99 (ATCC 700824) were cultured with brain heart infusion broth (BHI; Oxoid) supplemented with 10% horse serum (Invitrogen) incubated at 37°C in a humidified CO2 incubator (Forma Steri-Cycle) for 3 days. Minimum inhibitory concentration (MIC) was determined by a modified microtiter broth dilution method on sterile 96-well Polypropylene microtiter plates with round-bottom wells (Eppendorf). Briefly, *T. vulgaris* extract was diluted in 5% DMSO to give a 10x working stock solution. *H. pylori* was diluted to a final concentration of  $2 \times 10^6$  CFU/mL in culture medium. Aliquots of 10µL of the extract were added to 90µL of *H. pylori* in a well of the microtiter plate. Concentration of the compound ranged from 31.25 to 250 µg/mL. The microtiter plate was incubated for 3 days in a CO2 incubator. The plate was examined visually and measured using a microplate reader (Varioskan Flash) at 600 nm to determine the lowest concentration showing complete growth inhibition, which was recorded as the MIC. Minimum bactericidal concentration (MBC) as the lowest concentration without growth on a chocolate agar plate supplemented with 7% lysed horse blood. Wells containing *H. pylori* with 10 µL of 5% DMSO and BHI medium containing 250 µg/mL of *T. vulgaris* extract were used as control and blanks respectively. The results were recorded in accordance with the Clinical and Laboratory Standards Institute [30].

### Omeprazole

Omeprazole was obtained from a high street pharmacy. The drug was dissolved in carboxymethyl cellulose (CMC) and administered orally to the rats in concentrations of 20 mg/kg body weight (5 ml/kg) [33,34]. Only group 3 (the reference group) was received oral doses of 20 mg/kg omeprazole in CMC as positive control for one hour period prior ulcer inducing by ethanol.

### Acute toxicity test

Acute toxicity study was carried out to determine a safe dose of *T. vulgaris* extract and was conducted according to Organization for Economic Cooperation and Development (OECD) guidelines, 2002. Throughout the experiment, all rats were cared for according to the standards of the Guide for the Care and Use of Laboratory Animals prepared by the National Academy of Sciences and published by the Nationwide Institute of Healthiness. Experimental rats were acquired from the Animal House Experimental Unit of Cihan University-Erbil. Acute toxicity assessment was achieved to fix the toxic dose of *T. vulgaris* extract. Rats were fed normal rat pellets ad libitum and tap water. Thirty-six pathogen free rats (18 males and 18 females) were allocated equally each into 3 groups and administered vehicle (0.5% CMC); 2g/kg and 5g/kg of *T. vulgaris* extract. Experimental rats were starved overnight (food) but allowed access to water. Rats were watched for 30 min and 1, 2, 3, and 24 hrs. for any toxic signs or death. Appearance and behavior of the animals were analogous for all groups of animals during the observation period [35]. Rats were then fasted overnight on day 14<sup>th</sup> and sacrificed on day 15<sup>th</sup> using general anesthesia, i.e., Ketamine (30 mg/kg, 100 mg/mL) and Xylazine (3 mg/kg, 100 mg/mL) [36]. Blood was collected by intracardiac puncture for liver and kidney function tests. Histopathology of liver and kidney stained by H & E stain and examined for any structural variations [37].

### Experimental animals and Ethanol-induced gastric ulceration

Rats (Sprague Dawley rats) were obtained from the Experimental Animal House, Cihan University, Kurdistan Region, Iraq. The study was approved by the Ethics Committee for Animal Experimentation, College of Health Sciences, Hawler Medical University, Ethic No. (ERB 1457/2021). Rats were divided randomly into 5 groups of 6 rats each, weighed between 200–220 g. Each group was placed in a separate cage (6 rats per cage) with wide-mesh wire bottoms to prevent coprophagia during the experiment. The animals were maintained on a standard pellet diet and tap water. Throughout the experiments, all animals received human care according to the criteria outlined in the “Guide for the Care and Use of laboratory Animals” prepared by the National Academy of Sciences and published by the National Institute of Health. Before the experiment, they were food fasted for 24 hours and water fasted for 2 hours. Groups 1 (vehicle group) and 2 (ulcerated group) were administered orally with absolute ethanol (5 mL/kg). Group 3 was given 20 mg/kg omeprazole orally, as the reference control group. Groups 4 and 5 were given low, 250 mg/kg and high 500 mg/kg, oral doses of *T. vulgaris* extract. One hour after this pre-treatment; groups 2, 3, 4 and 5 of rats were given absolute ethanol (5 ml/kg) in order to induce gastric ulcers, and were then anesthetized using xylazine and ketamine, followed by cervical dislocation and direct excision of their stomachs [2,38].

### Measurement of gastric juice acidity and mucus content

Each stomach was opened along the greater curvature. Gastric contents were analyzed for hydrogen ion concentration using pH meter titration with 0.1 N NaOH. The acid content and gastric mucosa were assessed to measure the gastric juice acidity [33,39].

**Serum sample preparations and measurement of TNF $\alpha$ , IL6 and IL 10.** Blood samples were collected from rats, and serum was collected and preserved at (-80°C) until use. TNF $\alpha$ , IL6 and IL 10 were measured by ELISA kit (Thermo Scientific) as previously reported [16].

### Histological evaluation of gastric lesions hematoxylin and eosin staining

The gastric wall specimens were fixed in 10% buffered formalin, processed, and embedded in paraffin. Sections of the stomach were prepared at a thickness of 5  $\mu$  and stained with

hematoxylin and eosin for histological and tissue architecture estimation [30]. The prepared tissue sections were also stained with commercial periodic acid Schiff base (PAS) according to the manufacture instruction (Sigma Aldrich, Malaysia, Periodic Acid-Schiff (PAS) Kit). The positive glycoprotein site staining magenta. Animal Research Kit (ARKTM) was used to investigate the immunohistochemical localization proteins of HSP70 (1:100) and Bax (1: 200) on the study slides. Both antibodies were purchased from Santa Cruz Biotechnology, Inc., California, USA. Immunostaining was done by DAKO ARK (Animal Research Kit), Peroxidase (DAKO, Carpinteria, CA, USA), to investigate the immunohistochemical localization of heat shock protein-70 (HSP70 Mouse monoclonal antibody, IgG2b).

### Statistical analysis

Statistical package for the social science (IBM SPSS version 24) was used to input data and treatment. T-test two independent samples was used to examine the differences in the average measurement of some studied variables. Significant was considered at  $P < 0.05$ . Tukey HSD test was used for multiple comparisons.

## Results and discussion

### GC/MS analysis for standardization of *T. vulgaris* extract

Identification of the essential oil constituents of the extract was made based on their retention indices, matching their mass spectra with NIST-17 and Wiley library database as well as published the data in the literature. GC/MS analysis of *T. vulgaris* extract resulted in the identification of 30 volatile components as summarized in Table 1 and Fig 1.

The plant extract used in this study contain around 30 compounds, with different concentrations. The major volatile component identified was Quinic acid (12.82%), 2-Methoxy-4-methylphenol (11.42%) and other active phenols such as Thymol and Carvacrol with 4.07% and 6.37% respectively.

### In vitro anti-*H. pylori* activity

In our continuous investigation of mechanisms underlying the observed gastro protective effect of *T. vulgaris* the microtiter dilution method was performed to examine the antibacterial action of *T. vulgaris* extract against *H. pylori*. Results showed that the extract used in this study represents a respective MIC value of 250 µg/ml against two *H. pylori* strains; *H. pylori* NCTC11637 and *H. pylori* J99.

### Acute toxicity study

The acute toxicity study did not show any signs of toxicity. There was no histological sign of hepatic toxicity and renal toxicity. Furthermore, blood biochemistry such as urea, creatinine and bilirubin investigation were within normal ranges. None of animals that were fed with *T. vulgaris* extract displayed any mortality or toxic symptoms during the experimental study. There were no abnormal physiological or behavioral variations at dosages of 2 gm and 5 gm/kg following *T. vulgaris* extract administration. The histological analysis and biochemical evaluation on the liver and kidney were normal compared to the control groups (Fig 2).

**Effect of *T. vulgaris* extract on gastric acid secretion and gross evaluation.** Results produced from this study showed that there were significant differences between treatment groups on gastric acid secretion compared to the control. The results also showed that animal pre-treated with omeprazole or *T. vulgaris* were clearly reduced ulcer area formation compared to the ulcer control group Table 2 and Fig 3; while ethanol-induced clear gastric mucosal damage



Table 1. Gas chromatography/Mass spectrometry GC/MS analysis of *T. vulgaris* extract and percentage of essential components.

| No. | Compound                                               | Percentage (%) |
|-----|--------------------------------------------------------|----------------|
| 1   | 2,2-dimethoxybutane                                    | 2.88           |
| 2   | DL-Glyceraldehyde                                      | 0.41           |
| 3   | Hexadecanoic acid, 3-hydroxy-, methyl ester            | 0.53           |
| 4   | 2-Methyl-3-(methylthio)-1-propene                      | 1.82           |
| 5   | Thiazolidine                                           | 2.37           |
| 6   | Carbonodithioic acid                                   | 2.91           |
| 7   | 2,4-Dihydroxy-2,5-dimethyl-3(2H)-furan-3-one           | 0.89           |
| 8   | Benzene, 1-methyl-2-(1-methylethyl)-                   | 0.90           |
| 9   | Thymine                                                | 2.39           |
| 10  | 2-Methoxy-4-methylphenol                               | 11.42          |
| 11  | 4H-Pyran-4-one, 2,3-dihydro-3,5-dihydroxy-6-methyl-    | 1.42           |
| 12  | 1,2-Benzenediol                                        | 0.96           |
| 13  | Methyl 3-hydroxydodecanoate                            | 0.93           |
| 14  | Thymol                                                 | 4.07           |
| 15  | Indole                                                 | 4.84           |
| 16  | Carvacrol                                              | 6.37           |
| 17  | Sucrose                                                | 7.52           |
| 18  | 2-Hydroxy-5-methylbenzaldehyde                         | 7.43           |
| 19  | Quinic acid                                            | 12.82          |
| 20  | Hydrazinecarbothioamide                                | 0.89           |
| 21  | D-Mannose                                              | 1.13           |
| 22  | Cyclododecasiloxane                                    | 1.32           |
| 23  | Phenol 4-(3-hydroxy-1-propenyl-2-methoxy)              | 1.32           |
| 24  | Syringic acid                                          | 1.77           |
| 25  | 2,3-Dimethylhydroquinone                               | 1.71           |
| 26  | 1,2-Benzenediol bis(trimethylsilyl) ether              | 0.62           |
| 27  | Hexadecanoic acid                                      | 1.89           |
| 28  | 3-Methoxy-5-methylphenol                               | 0.81           |
| 29  | Benzeneethanamine, 2,5-dimethoxy- $\alpha$ ,4-dimethyl | 2.21           |
| 30  | 4-Vinylguaiaicol                                       | 0.07           |

<https://doi.org/10.1371/journal.pone.0287569.t001>

in the form of dark hemorrhagic bands. Histological sections stained with H and E of animals pretreated with the plant extract in this study have relatively better protection as seen by decreasing ulcer area, decrease of edema and flattening of mucosal fold compared to the ulcer control group.

Rat's stomach stained with PAS showed that, the plant extract at low and high dose and omeprazole pretreatment were resulted in the development of a noticeably continuous PAS-positive mucous gel layer that coating the entire gastric mucosal surface detected as magenta colour. Nevertheless, in the ulcer control group didn't display this magenta color of PAS stain, indicating the harmful effect of ethanol on gastric mucosa (Fig 4).

Immunohistochemical staining showed the overexpression of HSP-70 proteins in the gastric tissue of animals pretreated with the both low and high doses of the plant extract appeared by the strong brown color of the positively stained antigen (Fig 4), compared to the ulcer control group. The immunohistochemical staining of the Bax proteins (Fig 4) in the gastric mucosa showed increased in the ulcerated group while a significant reduction was confirmed in rats pre-treated with *T. vulgaris* extract.

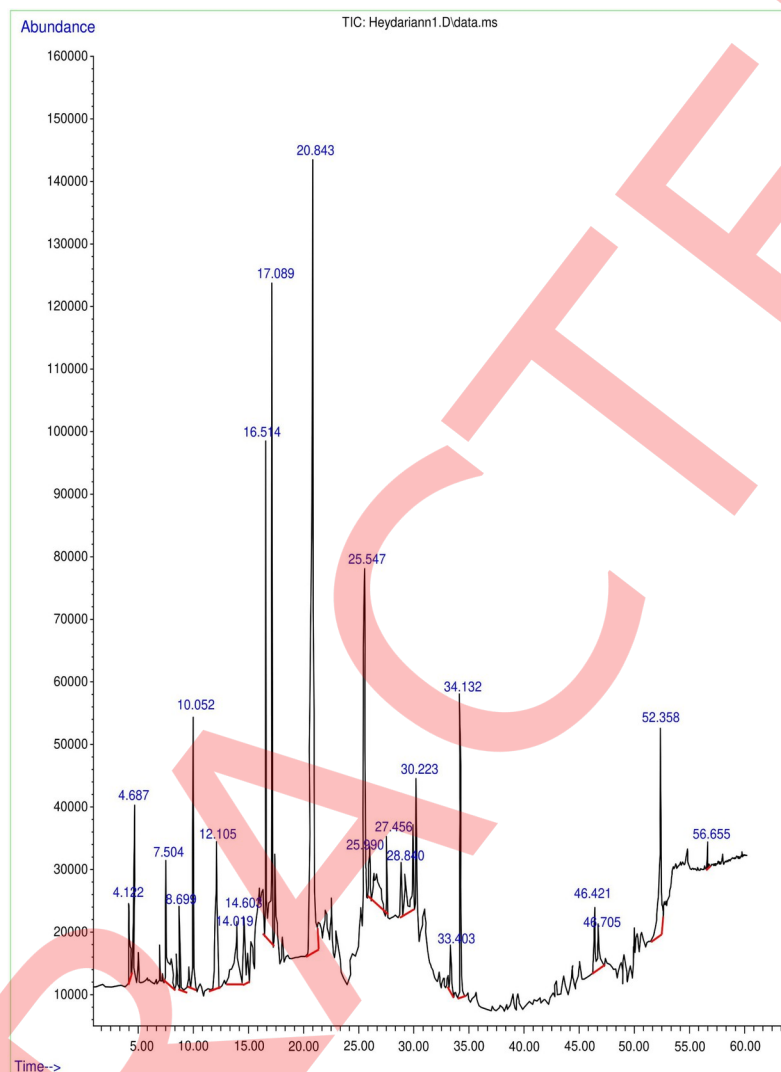

**Fig 1. Gas chromatography/Mass spectrometry (GC/MS) chromatogram of essential components of *T. vulgaris*.**

<https://doi.org/10.1371/journal.pone.0287569.g001>

Therapeutic plants and their active constituents have been utilized in out-of-date medicine for gastric ulcer medications for ancient times. Several trainings have been described by many gastric ulcer investigators utilizing curative plants and their active complexes for gastroprotective influences in rats [40,41]. Induction of acute gastric ulcer in rat's stomach by oral administration of absolute alcohol was easy and simple technique to evaluate gastroprotective activity of remedial plant extracts and their active composites, because absolute ethanol simply infiltrates into the stomach epithelium and induced gastric damages [42–44].

Absolute ethanol-induced gastric ulcer in rats is a well-established model to evaluate the mechanism of new therapeutics. This model looks like the symptoms of acute peptic ulcer that happen in humans. Hence, it has been extensively employed in gastroprotective assessment of botanicals. Absolute ethanol produced widespread disturbance of stomach mucus fence accompanied by deteriorated mucus excretion and reduced endogenous enzyme levels. Moreover, ethanol increased the microvascular penetrability in addition to amplified lipid peroxidation. Additionally, ethanol enhanced free radical formation in the gastric mucosa, succeeding

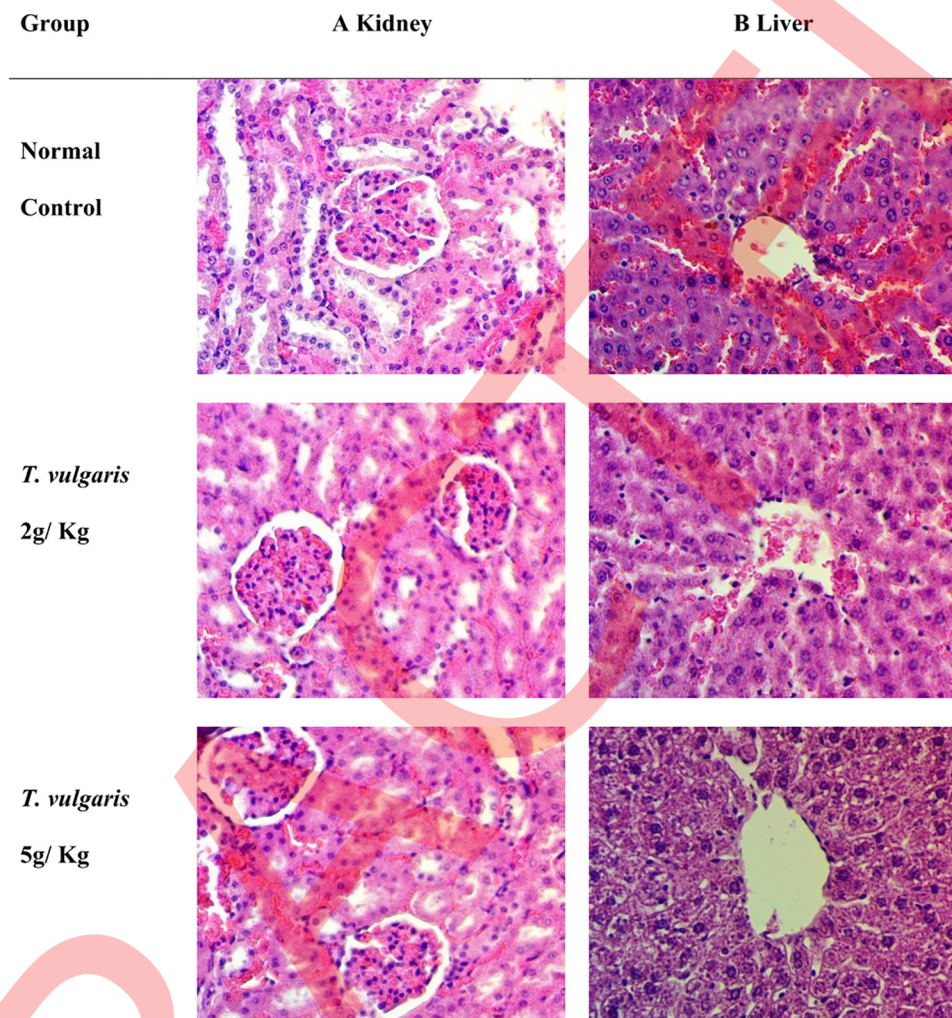

**Fig 2. Effects of *T. vulgaris* extract on histology of liver and kidney in acute toxicity test.** No significant differences in the structural changes between treatment (*T. vulgaris*) and control groups (magnification 40x).

<https://doi.org/10.1371/journal.pone.0287569.g002>

severe stomach epithelial injury [2,27,45–47]. Stomach mucus may show significant part in the mucosal defense against ethanol [8,12]. The results of our research established that oral administration of *T. vulgaris* could protect the mucosa by secreting extra mucus against extensive stomach tissue obliteration by ethanol. The anti-ulcer activity of *T. vulgaris* not only

**Table 2. Effect of *T. vulgaris* on mucus weight, pH of stomach, ulcer area in rat's stomachs.**

| Animal groups             | Pre-feeding (5mL/kg)          | Mucus weight (g) | pH            | Ulcer area (mm) <sup>2</sup> |
|---------------------------|-------------------------------|------------------|---------------|------------------------------|
| G1 Normal control         | 0.5 CMC                       | 2.34 ± 0.07      | 6.51 ± 0.04   | -                            |
| G2 Ulcer control          | 0.5 CMC                       | 0.818 ± 0.06*    | 2.51 ± 0.049* | 648.33 ± 2.61*               |
| G3 Omeprazole             | 20 mg/kg Omeprazole           | 2.27 ± 0.01*     | 5.48 ± 0.038* | 92.66 ± 0.80*                |
| G4 ( <i>T. vulgaris</i> ) | <i>T. vulgaris</i> (250mg/kg) | 1.36 ± 0.17*     | 5.16 ± 0.093* | 129.33 ± 1.20*               |
| G5 ( <i>T. vulgaris</i> ) | <i>T. vulgaris</i> (500mg/kg) | 1.72 ± 0.009*    | 4.77 ± 0.25*  | 93.83 ± 1.35*                |

Tukey HSD test was used for multiple comparisons in which each group of 2, 3, 4 and 5 were compared to G1 NC, values are expressed as mean ± S.E.M. (N = 6).

\* The mean difference is significant at  $p < 0.05$ .

<https://doi.org/10.1371/journal.pone.0287569.t002>



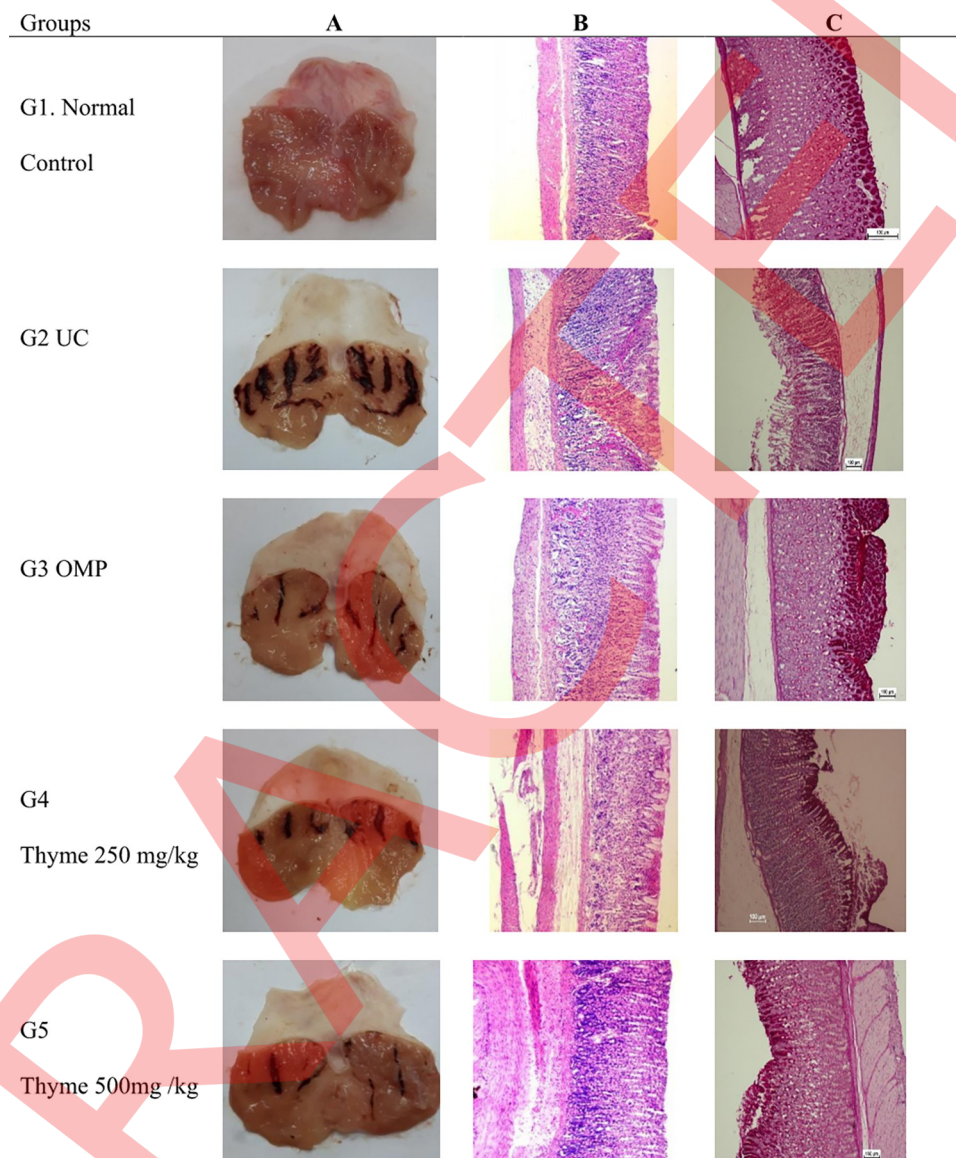

**Fig 3. Effects of *T. vulgaris* on ethanol-induced stomach damage in rats.** (G1) Normal control group, (G2) Ulcer control group, (G3) Omeprazole group, (G4) *T. vulgaris* extract 250 mg/kg and (G5) *T. vulgaris* 500 mg/kg. (A) Gross morphology, (B) Hematoxylin & Eosin stain, (C) PAS stain (magnification 20×).

<https://doi.org/10.1371/journal.pone.0287569.g003>

condensed ethanol-induced stomach injury but also led to important lessening of inflammatory cell penetration in the submucosal layer.

The direct and indirect toxicity employed by ethanol is through multifactorial ways, which induces ulcers in experimental models with elongated hemorrhagic lesion, submucosal oedema, leukocyte penetration, and epithelial cell damage [6]. The ulcer control group that received the ethanol clearly showed severely disrupted lamina epithelial is and hemorrhagic necrosis, which deeply extended in the mucosa and oedema in the submucosa with leukocytes infiltration [5,8]. The present data obviously confirmed that the oral administration of *T. vulgaris* extract had the capacity to exhibit gastroprotective activity against ethanol induced ulcer *in vivo* in a rat model. The data from our research recognized that *T. vulgaris* protected the gastric mucosa from the noxious effects of ethanol in a dose dependent manner. Furthermore, it

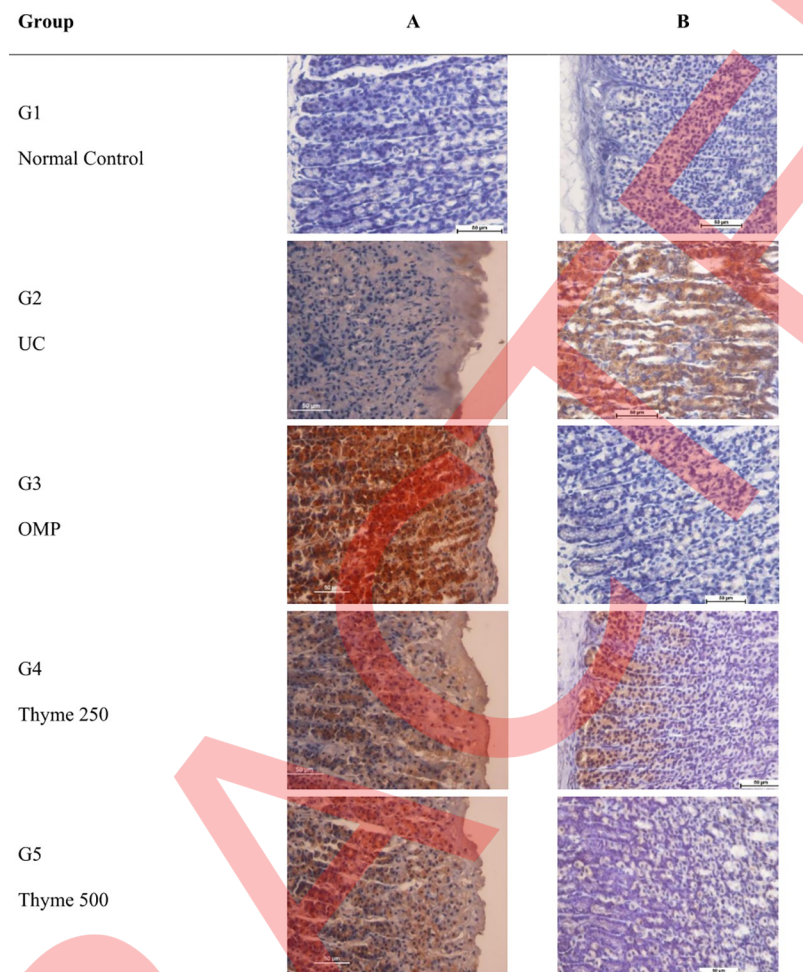

**Fig 4. Effects of *T. vulgaris* on the expression of HSP 70 and Bax proteins in ethanol-induced stomach damage in rats.** (G1) Normal control group, (G2) Ulcer control group (G3) Omeprazole group, (G4) *T. vulgaris* group 250 mg/kg and (G5) *T. vulgaris* 500 mg/kg. (A) HSP 70 (B) Bax stain (magnification 20×).

<https://doi.org/10.1371/journal.pone.0287569.g004>

also shed light on the observations of the molecular mechanism elaborate in gastroprotection [1].

Pro-inflammatory cytokines secreted by macrophages have been described as playing a very significant part in ethanol-induced gastric ulcer damage with neutrophil permeation into stomach mucosa [16]. In our research, we found that *T. vulgaris* decreased the TNF- $\alpha$  level in serum. The 500 mg/kg *T. vulgaris* exhibited high significance in the lessening of TNF- $\alpha$  level comparable to omeprazole (Table 3).

Histopathological assessment presented that *T. vulgaris* prevents leukocyte penetration, hemorrhage, edema, and epithelial cells damage in rat stomach tissues with ethanol-induced stomach ulceration. These variations propose that *T. vulgaris* decreases progress of extreme lesions related with stomach ulceration, an outcome that agrees with those of previous training. The inhibition influences of *T. vulgaris* were suggested to be through its antioxidant and anti-inflammatory activities [40]. Our result exposed that rats fed with *T. vulgaris* displayed an upsurge concentration of PAS staining in stomach slices compared to the ulcer control group. Correspondingly, numerous co-researchers utilizing diverse remedial plant have been described upsurge strength of PAS staining in stomach slices of experimental rats

Table 3. Effect of *T. vulgaris* extract on TNF $\alpha$ , IL6 and IL 10.

| Animals group     | TNF $\alpha$ (pg/ml) | IL 6 (pg/ml)         | IL 10 (pg/ml)        |
|-------------------|----------------------|----------------------|----------------------|
| G1 Normal Control | 41.96 $\pm$ 0.292    | 62.77 $\pm$ 0.795    | 134.25 $\pm$ 0.588   |
| G2 UC             | 150.83 $\pm$ 0.697** | 160.68 $\pm$ 0.733** | 73.93 $\pm$ 0.545**  |
| G3 OMP            | 83.19 $\pm$ 0.958**  | 93.42 $\pm$ 0.977**  | 134.66 $\pm$ 1.537   |
| G4 250 mg/kg      | 111.86 $\pm$ 0.964** | 119.47 $\pm$ 0.584** | 114.59 $\pm$ 0.865** |
| G5 500mg/kg       | 84.83 $\pm$ 0.780**  | 93.72 $\pm$ 0.756**  | 135.11 $\pm$ 1.979   |

Tukey HSD test was used for multiple comparisons in which each group of 2, 3, 4 and 5 were compared to G1 NC, values are expressed as mean  $\pm$  S.E.M. (N = 6).

\*The mean difference is significant at the 0.05 level.

\*\*The mean difference is significant at  $P < 0.01$ .

<https://doi.org/10.1371/journal.pone.0287569.t003>

[5,13,22,48,49]. Present beneficial approaches in gastric ulcer handling are intended to either suppress stomach acid discharge or improvement of influence of gastroprotective issues [12]. Absolute ethanol induces injuries in stomach mucosa by declining mucus and hydrogen carbonate and upsurge hydroperoxide and superoxide anion construction, thus encouraging stomach ulceration when given by mouth to rats [25]. *T. vulgaris* defends stomach mucosa from progress of ulcers; this outcome may be due to the free radical scavenging possessions of the *T. vulgaris* extract. Reactive oxygen species (ROS) are produced at a low rate in normal cellular metabolism and these oxidative radicals are hunted by the antioxidant protection system of the body, namely, SOD, and CAT. Thymol as one of the constituents of *T. vulgaris*, is responsible for its anti-oxidant activity by inducing the activity of endogenous antioxidant enzymes, such as superoxide dismutase, glutathione peroxidase, glutathione-S-transferase, catalase [5,20]. Meanwhile, the gathering of ROS increases LPO, the LPO content in the stomach mucosa can be utilized as a biomarker for expansion of ROS-mediated stomach mucosal lacerations [50].

In an existing investigation, *T. vulgaris* augmented SOD and CAT, and reduced LPO contents in the stomach mucosa, additional confirmation that *T. vulgaris* has gastroprotective possessions against the progress of ethanol-induced gastric ulceration. In scientific literature, several academics using several plant extracts showed similar antioxidant effects in ethanol-induced stomach ulcer by decreasing LPO and increasing CAT, SOD activities [2,25]. The results of the current study display that experimental animal's groups meaningfully condensed levels of MDA and elevated levels of SOD and CAT in stomach tissue homogenate in response to oxidative stress employed by absolute ethanol gavage, which could be due to the effect of carvacrol as one of the main components of the extract used in this study. MDA is the outcome of lipid peroxidation. Likewise, a vast number of studies have been stated by several investigators using medicinal plant or synthetic compounds which disclose increase endogenous enzymes level (SOD and CAT) and reduced in MDA level in gastric tissue homogenate [21,41,51–53]. The stomach mucosa assists as a physical fence against external and internal ulcer mediators through numerous mechanisms of defense [54]. One of these mechanisms is the construction of mucus lining the mucosa. Reduced mucus and acid manufacture by the gastric mucosa are amongst the aspects contributing to the progress of stomach ulceration. *T. vulgaris* increased the production of gastric mucus in addition to pH of stomach juice, which banned the expansion of stomach ulcers. Previous studies displayed that Bax protein, a proapoptotic protein, was up-regulated in ulcer control group with induction of gastric ulceration [5,6], *T. vulgaris* induced down-regulation of Bax protein in the rats gastric. This proposes that *T. vulgaris* inhibits cell death in the gastric mucosa, associated with the gastroprotective possessions of the extract. HSP 70 protein from heat shock protein family assists to defend cells from



oxidative stress injury. HSP 70 conserves the functional construction of normal proteins while eliminating injured proteins. In the gastric mucosa, ROS generation by ethanol hinders appearance of HSP 70, making the mucosal layer vulnerable to ulcerative injury [1,12]. However, treatment with *T. vulgaris* amplified the appearance of HSP 70 in the stomach mucosa with ethanol-induced ulcer, which proposes it to associate with the gastroprotective possessions of *T. vulgaris*. Similar results have been described by several researchers using different plant extracts [2,5,26]. In agreement with results of current study, a number of collaborators found that the induction of HSP 70 was associated with gastric protection from absolute ethanol. This is likely due to a reduction in ROS-mediated gastric oxidative stress [54–56]. The presence of HSP 70 is manifested by cellular pressure to protect it from various forms of stress that damage it. In the case of gastric ulcers, HSP 70 suggests protection by protecting normal protein structure as well as removing of damaged proteins [8,57].

Bax is pro-apoptotic protein and member of Bcl-2 family, associated with regulation apoptosis through mitochondrial damages [58]. In fact, absolute ethanol can cause lead to apoptosis in gastric epithelium by induction of pro-apoptotic proteins, for example, Bax and/or down-expression of anti-apoptotic bodies, such as Bcl-2 [13,25,59]. Bax protein was presented to be down-regulated and HSP70 protein was exhibited up-regulated in the gastric tissues slices of rats fed with *T. vulgaris* in comparison with the ulcer control group. Our outcomes were consistent with the results of some earlier researches representing that induction of HSP70 protein attended by suppression of Bax protein in rats can cause defense of stomach mucosa against damages induced by absolute ethanol [8,41,46].

## Conclusion

The present data displays the potential anti-ulcerogenic effects of *T. vulgaris* against ulcerative injury caused by ethanol. Moreover, the current study shows that the anti-ulcer characteristics of *T. vulgaris* may include a number of mechanisms including inhibition of stomach juice manufacture, improvement of stomach mucus excretion, upsurge in stomach juice pH, encouragement of antioxidant enzyme activities, down-regulation of Bax, and up-regulation of HSP70 appearance in the stomach mucosa. Based on the results showed in this study, *Thymus vulgaris* extract can be proposed as the safe medicinal plants for use and it has considerable gastroprotective potential via stomach epithelium protection against gastric ulcers and stomach lesions.

## Supporting information

**S1 File.**  
(PDF)

## Acknowledgments

Many thanks to Prof. Mahmood Ameen Abdulla and Dr. Suhayla Hamad Shareef for their cooperation during the practical part of the study.

## Author Contributions

**Conceptualization:** Salah Tofik Jalal Balaky.

**Formal analysis:** Salah Tofik Jalal Balaky.

**Investigation:** Salah Tofik Jalal Balaky.

**Methodology:** Salah Tofik Jalal Balaky.



**Project administration:** Salah Tofik Jalal Balaky.

**Writing – original draft:** Salah Tofik Jalal Balaky.

**Writing – review & editing:** Salah Tofik Jalal Balaky.

## References

1. Al-Wajeeh NS, Hajrezaie M, Al-Henhena N, Kamran S, Bagheri E, Zahedifard M, et al. The antiulcer effect of Cibotium barometz leaves in rats with experimentally induced acute gastric ulcer. *Drug Design, Development and Therapy*. 2017; 11:995. <https://doi.org/10.2147/DDDT.S107018> PMID: 28408799
2. Gwaram NS, Musalam L, Ali HM, Abdulla MA, Shaker SA. Synthesis, spectral characterization and biological activity of Zn (II) complex with 2'-[1-(2-hydroxyphenyl) ethylidene] benzenesulfanohydrazide. *Arabian Journal of Chemistry*. 2016 Nov 1; 9:S1197–207.
3. Narayanan M, Reddy KM, Marsicano E. Peptic ulcer disease and *Helicobacter pylori* infection. *Missouri medicine*. 2018 May; 115(3):219. PMID: 30228726
4. Lanas A. and Chan F.K., 2017. Peptic ulcer disease. *The Lancet*, 390(10094), pp.613–624. [https://doi.org/10.1016/S0140-6736\(16\)32404-7](https://doi.org/10.1016/S0140-6736(16)32404-7) PMID: 28242110
5. Omar H, Nordin N, Hassandarvish P, Hajrezaie M, Azizan AH, Fadaeinasab M, et al. Methanol leaf extract of *Actinodaphne sesquipedalis* (Lauraceae) enhances gastric defense against ethanol-induced ulcer in rats. *Drug Design, Development and Therapy*. 2017 May 4:1353–65. <https://doi.org/10.2147/DDDT.S120564> PMID: 28496305
6. Sidahmed HM, Hashim NM, Abdulla MA, Ali HM, Mohan S, Abdelwahab SI, et al. Antisecretory, gastro-protective, antioxidant and anti-*Helicobacter pylori* activity of zerumbone from *Zingiber zerumbet* (L.) Smith. *PloS one*. 2015 Mar 23; 10(3):e0121060. <https://doi.org/10.1371/journal.pone.0121060> PMID: 25798602
7. Kuna L., Jakab J., Smolic R., Raguz-Lucic N., Vcev A. and Smolic M., 2019. Peptic ulcer disease: a brief review of conventional therapy and herbal treatment options. *Journal of clinical medicine*, 8(2), p.179. <https://doi.org/10.3390/jcm8020179> PMID: 30717467
8. Ibrahim IA, Abdulla MA, Hajrezaie M, Bader A, Shahzad N, Al-Ghamdi SS, et al. The gastroprotective effects of hydroalcoholic extract of *Monolluma quadrangula* against ethanol-induced gastric mucosal injuries in Sprague Dawley rats. *Drug Design, Development and Therapy*. 2016; 10:93.
9. Woolf A. StatPearls Publishing; Treasure Island, FL, USA: 2022. Gastric ulcer.[Abstract][Google Scholar].
10. Goderska K, Agudo Pena S, Alarcon T. *Helicobacter pylori* treatment: antibiotics or probiotics. *Applied microbiology and biotechnology*. 2018 Jan; 102(1):1–7. <https://doi.org/10.1007/s00253-017-8535-7> PMID: 29075827
11. Boutemine IM, Amri M, Amir ZC, Fitting C, Mecherara-Idjeri S, Layaida K, et al. Gastro-protective, therapeutic and anti-inflammatory activities of *Pistacia lentiscus* L. fatty oil against ethanol-induced gastric ulcers in rats. *Journal of ethnopharmacology*. 2018 Oct 5; 224:273–82. <https://doi.org/10.1016/j.jep.2018.05.040> PMID: 29859303
12. Saremi K, Rad SK, Tayeb F, Abdulla MA, Karimian H, Majid NA. Gastroprotective activity of a novel Schiff base derived dibromo substituted compound against ethanol-induced acute gastric lesions in rats. *BMC Pharmacology and Toxicology*. 2019 Dec; 20(1):1–3.
13. Salehi B, Mishra AP, Shukla I, Sharifi-Rad M, Contreras MD, Segura-Carretero A, et al. Thymol, thyme, and other plant sources: Health and potential uses. *Phytotherapy Research*. 2018 Sep; 32(9):1688–706. <https://doi.org/10.1002/ptr.6109> PMID: 29785774
14. Hajrezaie M, Salehen N, Karimian H, Zahedifard M, Shams K, Batran RA, et al. Biochanin a gastroprotective effects in ethanol-induced gastric mucosal ulceration in rats. *PloS one*. 2015 Mar 26; 10(3):e0121529. <https://doi.org/10.1371/journal.pone.0121529> PMID: 25811625
15. Taher MS, Salloom YF, Al-Asadi RA, Al-Mousswi ZJ, Alamrani HA. The medicinal importance of Thyme plant (*Thymus vulgaris*). *Biomedicine*. 2021 Oct 29; 41(3):531–4.
16. Abood WN, Abdulla MA, Ismail S. Involvement of inflammatory mediators in the gastroprotective action of *Phaleria macrocarpa* against ethanol-induced gastric ulcer. *World Applied Sciences Journal*. 2014; 30:344–50.
17. Moghadamtousi SZ, Rouhollahi E, Hajrezaie M, Karimian H, Abdulla MA, Kadir HA. *Annona muricata* leaves accelerate wound healing in rats via involvement of Hsp70 and antioxidant defence. *International Journal of Surgery*. 2015 Jun 1; 18:110–7. <https://doi.org/10.1016/j.ijsu.2015.03.026> PMID: 25899210

18. Taha MM, Abdelwahab SI, Elsanousi R, Sheikh BY, Abdulla MA, Babiker SE, et al. Effectiveness of Sidr Honey on the prevention of ethanol-induced gastrulcerogenesis: role of antioxidant and antiapoptotic mechanism. *Pharmacognosy Journal*. 2015; 7(3).
19. Yu Y.M., Chao T.Y., Chang W.C., Chang M.J. and Lee M.F., 2016. Thymol reduces oxidative stress, aortic intimal thickening, and inflammation-related gene expression in hyperlipidemic rabbits. *Journal of food and drug analysis*, 24(3), pp.556–563. <https://doi.org/10.1016/j.jfda.2016.02.004> PMID: 28911561
20. Saeed AL-Wajeeh N, Halabi MF, Hajrezaie M, M. Dhiyaaldeen S, Abdulaziz Bardi D, M. Salama S, et al. The gastroprotective effect of vitex pubescens leaf extract against ethanol-provoked gastric mucosal damage in sprague-dawley rats. *Plos one*. 2016 Sep 30; 11(9):e0157431. <https://doi.org/10.1371/journal.pone.0157431> PMID: 27689880
21. Halabi MF, Shakir RM, Bardi DA, Al-Wajeeh NS, Ablat A, Hassandarvish P, et al. Gastroprotective activity of ethyl-4-[(3, 5-di-tert-butyl-2-hydroxybenzylidene) amino] benzoate against ethanol-induced gastric mucosal ulcer in rats. *PLoS one*. 2014 May 6; 9(5):e95908. <https://doi.org/10.1371/journal.pone.0095908> PMID: 24800807
22. Liu J, Xiao M, Hui J. Efficacy and Safety of Omeprazole and Amoxicillin in the Treatment of Gastric Ulcer. *Journal of Clinical and Nursing Research*. 2021 May 31; 5(3).
23. Kangwan N, Park JM, Kim EH, Hahm KB. Quality of healing of gastric ulcers: natural products beyond acid suppression. *World journal of gastrointestinal pathophysiology*. 2014 Feb 2; 5(1):40. <https://doi.org/10.4291/wjgp.v5.i1.40> PMID: 24891974
24. Rouhollahi E, Zorofchian Moghadamtousi S, Hamdi OA, Fadaeinasab M, Hajrezaie M, Awang K, et al. Evaluation of acute toxicity and gastroprotective activity of curcuma purpurascens Bl. rhizome against ethanol-induced gastric mucosal injury in rats. *BMC Complementary and Alternative medicine*. 2014 Dec; 14(1):1–0. <https://doi.org/10.1186/1472-6882-14-378> PMID: 25283308
25. Salga MS, Ali HM, Abdulla MA, Abdelwahab SI, ElhassanTaha MM, Yagoub U. Synthesis and gastro-protective activities of some zinc (II) complexes derived from (E)-2-(1-(2-(piperazin-1-yl) ethylimino) ethyl) phenol and (E)-4-(1-(2-(piperazin-1-yl) ethylimino) ethyl) benzene-1, 3-diol Schiff bases against aspirin induced ulceration. *Arabian Journal of Chemistry*. 2017 May 1; 10:S1578–89.
26. Nordin N, Salama SM, Golbabapour S, Hajrezaie M, Hassandarvish P, Kamalidehghan B, et al. Anti-ulcerogenic effect of methanolic extracts from *Enicosanthellum pulchrum* (King) Heusden against ethanol-induced acute gastric lesion in animal models. *PLoS one*. 2014 Nov 7; 9(11):e111925. <https://doi.org/10.1371/journal.pone.0111925> PMID: 25379712
27. Xie C, Liu L, Zhu S, Wei M. Effectiveness and safety of Chinese medicine combined with omeprazole in the treatment of gastric ulcer: A protocol for systematic review and meta-analysis. *Medicine*. 2021 Apr 30; 100(17). <https://doi.org/10.1097/MD.00000000000025744> PMID: 33907169
28. Xiao M, Liu J, Hui J. Analysis of the Effect of Pantoprazole and Omeprazole on Pain Relief in Patients with Gastric Ulcer. *Journal of Clinical and Nursing Research*. 2021 May 31; 5(3).
29. Savarino V, Dulbecco P, De Bortoli N, Ottonello A, Savarino E. The appropriate use of proton pump inhibitors (PPIs): need for a reappraisal. *European journal of internal medicine*. 2017 Jan 1; 37:19–24. <https://doi.org/10.1016/j.ejim.2016.10.007> PMID: 27784575
30. Mahmood AA, Philip K, Salmah I. Anti ulcerogenic effect of the rhizomes of *Zingiber officinale* against ethanol induced gastric ulcers in rats. *Journal of Animal and Veterinary Advances*. 2006, 5(2): 122–125.
31. Abdulla MA, Al-Bayaty FH, Younis LT, Abu Hassan MI. Anti-ulcer activity of *Centella asiatica* leaf extract against ethanol-induced gastric mucosal injury in rats. *J Med Plants Res*. 2010 Jul 4; 4(13):1253–9.
32. Shosha NN, Fahmy NM, Singab AN, Mohamed RW. Anti-ulcer effects of cumin (*Cuminum cyminum* L.), thyme (*Thymus vulgaris* L.), and caraway (*Carum carvi* L.) essential oils on peptic ulcer and ulcerative colitis models in rats. *J Herbmed Pharmacol*. 2022 Jul; 11:389–400.
33. Noor SM, Mahmood AA, Salmah I, Philip K. Prevention of acute gastric mucosal lesions by *R. hasseltii* in rats. *J Anim Vet Adv*. 2006; 5:161–4.
34. Mahmood AA, Sidik K, Fouad HM. Prevention of ethanol-induced gastric mucosal injury by *Ocimum basilicum* seed extract in rats. *ASM Science Journal*. 2007; 1(1):1–6.
35. Mahmood AA, Sidik K, Salmah I, Suzainur KA, Yusoff KM. Cytoprotective effects of honey and methanol extracts from *P. granatum* L. fruit peel and *N. sativa* L seeds on ethanol-induced gastric damage in rats. *Journal of Food Technology*. 2004; 2(3):136–41.
36. Farghadani R, Seifaddinipour M, Rajarajeswaran J, Abdulla MA, Hashim NB, Khaing SL. In vivo acute toxicity evaluation and in vitro molecular mechanism study of antiproliferative activity of a novel indole Schiff base  $\beta$ -diiminato manganesell complex in hormone-dependent and triple negative breast cancer cells. *PeerJ*. 2019 Oct 7; 7:e7686.

37. Alsalahi A, Abdulla MA, Al-Mamary M, Noordin MI, Abdelwahab SI, Alabsi AM, et al. Toxicological features of *Catha edulis* (Khat) on livers and kidneys of male and female Sprague-Dawley rats: A subchronic study. *Evidence-Based Complementary and Alternative Medicine*. 2012 Jan 1;2012. <https://doi.org/10.1155/2012/829401> PMID: 23259000
38. Fard AA, Hajrezaie M, Kadir FA, Sefideh FA, Salama SM, Al-Najar ZA, et al. The effects of combined Adiponectin-Metformin on glucose and lipids levels in mice and acute toxicity and anti-ulcerogenic activity of Adiponectin against ethanol-induced gastric mucosal injuries in rat. *Molecules*. 2011 Nov 15; 16(11):9534–52.
39. Fathi FM, Harita H, Mahmood A, Hamid K, Hapipah MA. Cytoprotective effect of Benzyl N'-(indol-3-ylmethylidene)-hydrazinecarbodithioate against ethanol-induced gastric mucosal injury in rats. *African Journal of Pure and Applied Chemistry*. 2011 Mar 31; 5(3):34–42.
40. Abdelwahab SI, Taha MM, Abdulla MA, Nordin N, Hadi AH, Mohan S, et al. Gastroprotective mechanism of *Bauhinia thonningii* Schum. *Journal of Ethnopharmacology*. 2013 Jun 21; 148(1):277–86. <https://doi.org/10.1016/j.jep.2013.04.027> PMID: 23612423
41. Zhou D, Yang Q, Tian T, Chang Y, Li Y, Duan LR, et al. Gastroprotective effect of gallic acid against ethanol-induced gastric ulcer in rats: involvement of the Nrf2/HO-1 signaling and anti-apoptosis role. *Bio-medicine & Pharmacotherapy*. 2020 Jun 1; 126:110075. <https://doi.org/10.1016/j.biopha.2020.110075> PMID: 32179202
42. Qader SW, Abdulla MA, Chua LS, Sirat HM, Hamdan S. Pharmacological mechanisms underlying gastroprotective activities of the fractions obtained from *Polygonum minus* in Sprague Dawley rats. *International journal of molecular sciences*. 2012 Feb 1; 13(2):1481–96. <https://doi.org/10.3390/ijms13021481> PMID: 22408403
43. Moghadamtousi SZ, Rouhollahi E, Karimian H, Fadaeinasab M, Abdulla MA, Kadir HA. Gastroprotective activity of *Annona muricata* leaves against ethanol-induced gastric injury in rats via Hsp70/Bax involvement. *Drug design, development and therapy*. 2014; 8:2099. <https://doi.org/10.2147/DDDT.S70096> PMID: 25378912
44. Fahmy NM, Al-Sayed E, Michel HE, El-Shazly M, Singab AN. Gastroprotective effects of *Erythrina speciosa* (Fabaceae) leaves cultivated in Egypt against ethanol-induced gastric ulcer in rats. *Journal of ethnopharmacology*. 2020 Feb 10; 248:112297. <https://doi.org/10.1016/j.jep.2019.112297> PMID: 31606535
45. Ketuly K A., Hadi AH A., Golbabapour S, Hajrezaie M, Hassandarvish P, Ali HM, et al. Acute toxicity and gastroprotection studies with a newly synthesized steroid. *PloS one*. 2013 Mar 13; 8(3):e59296. <https://doi.org/10.1371/journal.pone.0059296> PMID: 23516624
46. Salama SM, Gwaram NS, AlRashdi AS, Khalifa SA, Abdulla MA, Ali HM, et al. A zinc morpholine complex prevents HCl/ethanol-induced gastric ulcers in a rat model. *Scientific Reports*. 2016 Jul 27; 6(1):1–5.
47. Armah FA, Henneh IT, Alake J, Ahlidja W, Amoani B, Ofori EG, et al. *Allanblackia floribunda* seed extract attenuates the ethanol-induced gastric ulcer in rats via the inhibition of TNF- $\alpha$  and INF- $\gamma$  levels and modulation in the expression of Ki67 protein. *BioMed Research International*. 2021 Jan 11;2021.
48. Ismail IF, Golbabapour S, Hassandarvish P, Hajrezaie M, Abdul Majid N, Kadir FA, et al. Gastroprotective activity of *Polygonum chinense* aqueous leaf extract on ethanol-induced hemorrhagic mucosal lesions in rats. *Evidence-Based Complementary and Alternative Medicine*. 2012 Oct;2012. <https://doi.org/10.1155/2012/404012> PMID: 23365597
49. Perumcherry Raman S, Dara PK, Vijayan DK, Chatterjee NS, Raghavankutty M, Mathew S, et al. Anti-ulcerogenic potential of anthocyanin-loaded chitosan nanoparticles against alcohol-HCl induced gastric ulcer in rats. *Natural Product Research*. 2022 Mar 4; 36(5):1306–10. <https://doi.org/10.1080/14786419.2020.1860041> PMID: 33331166
50. Al Batran R, Al-Bayaty F, Ameen Abdulla M, Jamil Al-Obaidi MM, Hajrezaei M, Hassandarvish P, et al. Gastroprotective effects of *C. orchorus olitorius* leaf extract against ethanol-induced gastric mucosal hemorrhagic lesions in rats. *Journal of Gastroenterology and Hepatology*. 2013 Aug; 28(8):1321–9. <https://doi.org/10.1111/jgh.12229> PMID: 23611708
51. Dhiyaaldeen SM, Amin ZA, Darvish PH, Mustafa IF, Jamil MM, Rouhollahi E, et al. Protective effects of (1-(4-hydroxy-phenyl)-3-m-tolyl-propenone chalcone in indomethacin-induced gastric erosive damage in rats. *BMC veterinary research*. 2014 Dec; 10(1):1–4. <https://doi.org/10.1186/s12917-014-0303-7> PMID: 25551777
52. Tayeb F, Salman AA, Kamran S, Khaing SL. Ulcer prevention effect of 3, 4, 5-tihydroxy-N0-[(2-methyl-1H-Indol-3yl) Methylidene] Benzohydrazide in HCl/Ethanol-Induced gastric mucosal damage in rats. *International Journal of Medical Sciences*. 2017; 14(13):1317. <https://doi.org/10.7150/ijms.20984> PMID: 29200945

53. Nazarbajhat N, Kadir FA, Ariffin A, Abdulla MA, Abdullah Z, Yehye WA. Antioxidant properties and gastroprotective effects of 2-(ethylthio) benzohydrazones on ethanol-induced acute gastric mucosal lesions in rats. PLoS One. 2016 Jun 7; 11(6):e0156022. <https://doi.org/10.1371/journal.pone.0156022> PMID: 27272221
54. Rahman Z, Dwivedi DK, Jena GB. Ethanol-induced gastric ulcer in rats and intervention of tert-butylhydroquinone: involvement of Nrf2/HO-1 signalling pathway. Human & Experimental Toxicology. 2020 Apr; 39(4):547–62. <https://doi.org/10.1177/0960327119895559> PMID: 31876185
55. Mohan S, Hobani YH, Shaheen E, Abou-Elhamd AS, Alhazmi HA, Abdelwahab SI. Girinimbine from curry leaves promotes gastro protection against ethanol induced peptic ulcers and improves healing via regulation of anti-inflammatory and antioxidant mechanisms. Food & function. 2020; 11(4):3493–505. <https://doi.org/10.1039/d0fo00053a> PMID: 32248216
56. Moawad H, El Awdan SA, Sallam NA, El-Eraky WI, Alkhawani MA. Gastroprotective effect of cimetidine against ethanol-and pylorus ligation-induced gastric lesions in rats. Naunyn-Schmiedeberg's Archives of Pharmacology. 2019 Dec; 392(12):1605–16. <https://doi.org/10.1007/s00210-019-01699-y> PMID: 31372695
57. He H, Li X, Yu H, Zhu S, He Y, Komatsu K, et al. Gastroprotective effect of araloside A on ethanol-and aspirin-induced gastric ulcer in mice: involvement of H<sup>+</sup>/K<sup>+</sup>-ATPase and mitochondrial-mediated signaling pathway. Journal of natural medicines. 2019 Mar; 73(2):339–52. <https://doi.org/10.1007/s11418-018-1256-0> PMID: 30523551
58. Ke Y, Zhan L, Lu T, Zhou C, Chen X, Dong Y, et al. Polysaccharides of *Dendrobium officinale* Kimura & Migo leaves protect against ethanol-induced gastric mucosal injury via the AMPK/mTOR signaling pathway in vitro and vivo. Frontiers in pharmacology. 2020 Nov 11; 11:526349.
59. Albaayit SF, Abba Y, Abdullah R, Abdullah N. Prophylactic effects of *Clausena excavata* Burum. f. leaf extract in ethanol-induced gastric ulcers. Drug Des Devel Ther 10: 1973–1986. <https://doi.org/10.2147/DDDT.S103993> PMID: 27366052
